# Supplementary material for: Assessing Animal Welfare in Animal-Visitor Interactions in Zoos and Other Facilities. A Pilot Study Involving Giraffes
Source: Animals (Basel). 2018 Aug 30;8(9):153. doi: 10.3390/ani8090153 (PMC6162555; doi:10.3390/ani8090153)
Supplement: Supplementary file 1 [file animals-08-00153-s001.xlsx]

## Sheet: SAM
giorni	int/contr	P/D/POST	P/D/POST1		T°C	Browse	Feed	Drink	Other	being fed	Self-grooming	Rest- Standing	Rest- Lying	Sleep	Walk	Sparring	Lick urine	Mount	Necking/Nuzzling/Rubbing	Grooming	Lick	Others	Not Visible	TOTALE	TOT VISIBLE
2017-08-07	C1	D	D1	C_M	25.2	0	0	0	0	0	9.663	136.343	0	0	0	0	0	0	0	0	97.264	0	0	243.27	243.27
2017-08-07	C2	D	D2	C_P	25.2	116.32	0	0	0	0	0	27.295	0	0	2.8	0	0	0	0	0	97.035	0	0	243.45	243.45
2017-08-22	C3	D	D2	C_P	22.1	0	0	0	0	0	0	198.234	0	0	22.434	0	0	0	15.753	0	0	0	0	236.421	236.421
2017-09-07	C4	D	D1	C_M	20.9	0	0	0	0	0	0	218.097	0	0	48.646	0	0	0	0	0	13.641	0	0	280.384	280.384
2017-09-07	C5	D	D2	C_P	20.9	0	0	0	0	0	0	185.247	0	0	58.473	0	0	0	0	0	0	0	0	243.72	243.72
2017-09-14	C6	D	D1	C_M	17.5	0	0	0	0	0	0	242.125	0	0	0	0	0	0	0	0	0	0	0	242.125	242.125
2017-09-21	C7	D	D1	C_M	15.5	0	0	0	0	0	0	0	0	0	0	0	0	0	0	0	231.785	0	0	231.785	231.785
2017-08-06	I1	D	D1	EE_M	26	0	0	0	0	148.541	0	0	0	0	0	0	0	0	0	0	0	0	0	148.541	148.541
2017-08-06	I2	D	D2	EE_P	26	0	0	0	0	257.844	0	16.086	0	0	84.755	0	0	0	0	0	0	0	0	358.685	358.685
2017-08-21	I3	D	D2	EE_P	22.2	0	0	0	0	113.906	0	23.112	0	0	8.121	0	0	0	0	0	0	0	0	145.139	145.139
2017-09-05	I4	D	D1	EE_M	21.1	0	0	0	0	139.892	0	62.685	0	0	31.211	0	0	0	0	0	0	0	0	233.788	233.788
2017-09-05	I5	D	D2	EE_P	21.1	0	0	0	0	164.184	0	169.822	0	0	20.936	0	0	0	0	0	0	0	0	354.942	354.942
2017-08-14	I6	D	D1	EE_M	23	0	0	0	0	108.118	0	77.135	0	0	50.407	0	0	0	0	0	0	0	0	235.66	235.66
2017-08-20	I7	D	D2	EE_M	22.2	0	0	0	0	221.307	0	14.674	0	0	0	0	0	0	0	0	0	0	0	235.981	235.981
2017-08-07	C1	Post	Post1	C_M	25.2	0	102.775	0	0	0	0	21.295	0	0	36.747	0	0	0	0	0	137.249	0	0	298.066	298.066
2017-08-07	C2	Post	Post2	C_P	25.2	0	0	0	0	0	0	248.696	0	0	45.128	0	0	0	0	0	0	0	0	293.824	293.824
2017-08-22	C3	Post	Post2	C_P	22.1	0	0	0	0	0	0	296.977	0	0	0	0	0	0	0	0	0	0	0	296.977	296.977
2017-09-07	C4	Post	Post1	C_M	20.9	0	28.38	0	0	0	0	215.262	0	0	60.119	0	0	0	0	0	0	0	0	303.761	303.761
2017-09-07	C5	Post	Post2	C_P	20.9	0	0	0	0	0	0	39.021	0	0	246.767	0	0	0	0	0	14.721	0	0	300.509	300.509
2017-09-14	C6	Post	Post1	C_M	17.5	0	0	0	0	0	0	272.078	0	0	30.605	0	0	0	0	0	0	0	0	302.683	302.683
2017-09-21	C7	Post	Post2	C_M	15.5	0	0	0	0	0	0	252.36	0	0	50.25	0	0	0	0	0	0	0	0	302.61	302.61
2017-08-06	I1	Post	Post1	EE_M	26	0	60.54	0	0	0	0	174.642	0	0	77.301	0	0	0	0	0	0	0	0	312.483	312.483
2017-08-06	I2	Post	Post2	EE_P	26	0	0	0	0	0	0	244.402	0	0	56.316	0	0	0	0	0	0	0	0	300.718	300.718
2017-08-21	I3	Post	Post2	EE_P	22.2	155.063	0	0	0	0	0	38.432	0	0	65.658	0	0	0	0	0	35.733	0	0	294.886	294.886
2017-09-05	I4	Post	Post1	EE_M	21.1	0	193.895	0	0	0	0	85.611	0	0	13.457	0	0	0	0	0	0	0	0	292.963	292.963
2017-09-05	I5	Post	Post2	EE_P	21.1	0	0	0	0	0	0	306.064	0	0	0	0	0	0	0	0	0	0	0	306.064	306.064
2017-08-14	I6	Post	Post1	EE_M	23	0	0	0	0	0	0	229.082	0	0	57.203	0	0	0	0	0	0	0	14.348	300.633	286.285
2017-08-20	I7	Post	Post2	EE_M	22	0	0	0	0	0	0	310.079	0	0	0	0	0	0	0	0	0	0	0	310.079	310.079
2017-08-07	C1	PRE	P1	C_M	25.2	4.236	0	0	0	0	0	277.011	0	0	21.615	0	0	0	0	0	0	0	0	302.862	302.862
2017-08-07	C2	PRE	P2	C_P	25.2	0	0	7.96	0	0	0	95.254	0	0	19.635	0	0	0	0	0	0	0	181.933	304.782	122.849
2017-08-22	C3	PRE	P2	C_P	22.1	0	0	0	0	0	0	299.065	0	0	0	0	0	0	0	0	0	0	0	299.065	299.065
2017-09-07	C4	PRE	P1	C_M	20.9	0	129.135	0	0	0	0	137.887	0	0	35.525	0	0	0	0	0	0	0	0	302.547	302.547
2017-09-07	C5	PRE	P2	C_P	20.9	0	0	0	0	0	0	307.537	0	0	0	0	0	0	0	0	0	0	0	307.537	307.537
2017-09-14	C6	PRE	P1	C_M	17.5	0	0	0	0	0	0	105.179	0	0	122.92	0	0	0	0	0	51.43	0	17.514	297.043	279.529
2017-09-21	C7	PRE	P1	C_M	15.5	0	0	0	0	0	0	304.052	0	0	0	0	0	0	0	0	0	0	0	304.052	304.052
2017-08-06	I1	PRE	P1	EE_M	26	40.736	0	0	0	0	0	55.018	0	0	168.502	0	0	0	0	0	0	32.294	0	296.55	296.55
2017-08-06	I2	PRE	P2	EE_P	26	0	0	0	0	0	0	314.29	0	0	0	0	0	0	0	0	0	0	0	314.29	314.29
2017-08-21	I3	PRE	P2	EE_P	22.2	0	0	0	0	0	0	299.747	0	0	0	0	0	0	0	0	0	0	0	299.747	299.747
2017-09-05	I4	PRE	P1	EE_M	21.1	0	0	0	0	0	0	0	0	0	0	308.362	0	0	0	0	0	0	0	308.362	308.362
2017-09-05	I5	PRE	P2	EE_P	21.1	0	0	0	0	0	0	302.187	0	0	0	0	0	0	0	0	0	0	0	302.187	302.187
2017-08-14	I6	PRE	P1	EE_M	23	0	0	0	0	0	0	307.706	0	0	0	0	0	0	0	0	0	0	0	307.706	307.706
2017-08-20	I7	PRE	P2	EE_M	22.2	0	0	0	0	0	0	93.226	0	0	0	0	0	0	0	0	206.49	0	0	299.716	299.716
giorni	int/contr	P/D/POST	P/D/POST1		T°C	Browse	Feed	Drink	Other	being fed	Self-grooming	Rest- Standing	Rest- Lying	Sleep	Walk	Sparring	Lick urine	Mount	Necking/Nuzzling/Rubbing	Grooming	Lick	Others	Not Visible	TOTALE	TOT VISIBLE
2017-08-07	C	D	D1	C_M	25.2	0	0	0	0	0	9.663	136.343	0	0	0	0	0	0	0	0	97.264	0
2017-08-07	C	D	D2	C_P	25.2	116.32	0	0	0	0	0	27.295	0	0	2.8	0	0	0	0	0	97.035	0
2017-08-22	C	D	D2	C_P	22.1	0	0	0	0	0	0	198.234	0	0	22.434	0	0	0	15.753	0	0	0
2017-09-07	C	D	D1	C_M	20.9	0	0	0	0	0	0	218.097	0	0	48.646	0	0	0	0	0	13.641	0
2017-09-07	C	D	D2	C_P	20.9	0	0	0	0	0	0	185.247	0	0	58.473	0	0	0	0	0	0	0
2017-09-14	C	D	D1	C_M	17.5	0	0	0	0	0	0	242.125	0	0	0	0	0	0	0	0	0	0	0	242.125	242.125
2017-09-21	C	D	D1	C_M	15.5	0	0	0	0	0	0	0	0	0	0	0	0	0	0	0	231.785	0	0	231.785	231.785
2017-08-06	I	D	D1	EE_M	26	0	0	0	0	148.541	0	0	0	0	0	0	0	0	0	0	0	0
2017-08-06	I	D	D2	EE_P	26	0	0	0	0	257.844	0	16.086	0	0	84.755	0	0	0	0	0	0	0
2017-08-21	I	D	D2	EE_P	22.2	0	0	0	0	113.906	0	23.112	0	0	8.121	0	0	0	0	0	0	0
2017-09-05	I	D	D1	EE_M	21.1	0	0	0	0	139.892	0	62.685	0	0	31.211	0	0	0	0	0	0	0
2017-09-05	I	D	D2	EE_P	21.1	0	0	0	0	164.184	0	169.822	0	0	20.936	0	0	0	0	0	0	0
2017-08-14	I	D	D1	EE_M	23	0	0	0	0	108.118	0	77.135	0	0	50.407	0	0	0	0	0	0	0	0	235.66	235.66
2017-08-20	I	D	D2	EE_M	22.2	0	0	0	0	221.307	0	14.674	0	0	0	0	0	0	0	0	0	0	0	235.981	235.981
2017-08-07	C	Post	Post1	C_M	25.2	0	102.775	0	0	0	0	21.295	0	0	36.747	0	0	0	0	0	137.249	0
2017-08-07	C	Post	Post2	C_P	25.2	0	0	0	0	0	0	248.696	0	0	45.128	0	0	0	0	0	0	0
2017-08-22	C	Post	Post2	C_P	22.1	0	0	0	0	0	0	296.977	0	0	0	0	0	0	0	0	0	0
2017-09-07	C	Post	Post1	C_M	20.9	0	28.38	0	0	0	0	215.262	0	0	60.119	0	0	0	0	0	0	0
2017-09-07	C	Post	Post2	C_P	20.9	0	0	0	0	0	0	39.021	0	0	246.767	0	0	0	0	0	14.721	0
2017-09-14	C	Post	Post1	C_M	17.5	0	0	0	0	0	0	272.078	0	0	30.605	0	0	0	0	0	0	0	0	302.683	302.683
2017-09-21	C	Post	Post2	C_M	15.5	0	0	0	0	0	0	252.36	0	0	50.25	0	0	0	0	0	0	0	0	302.61	302.61
2017-08-06	I	Post	Post1	EE_M	26	0	60.54	0	0	0	0	174.642	0	0	77.301	0	0	0	0	0	0	0
2017-08-06	I	Post	Post2	EE_P	26	0	0	0	0	0	0	244.402	0	0	56.316	0	0	0	0	0	0	0
2017-08-21	I	Post	Post2	EE_P	22.2	155.063	0	0	0	0	0	38.432	0	0	65.658	0	0	0	0	0	35.733	0
2017-09-05	I	Post	Post1	EE_M	21.1	0	193.895	0	0	0	0	85.611	0	0	13.457	0	0	0	0	0	0	0
2017-09-05	I	Post	Post2	EE_P	21.1	0	0	0	0	0	0	306.064	0	0	0	0	0	0	0	0	0	0
2017-08-14	I	Post	Post1	EE_M	23	0	0	0	0	0	0	218.149	0	0	54.4729	0	0	0	0	0	0	0	14.348	300.633	286.285
2017-08-20	I	Post	Post2	EE_M	22	0	0	0	0	0	0	310.079	0	0	0	0	0	0	0	0	0	0	0	310.079	310.079
2017-08-07	C	PRE	P1	C_M	25.2	4.236	0	0	0	0	0	277.011	0	0	21.615	0	0	0	0	0	0	0
2017-08-07	C	PRE	P2	C_P	25.2	0	0	3.20845	0	0	0	38.3942	0	0	7.91431	0	0	0	0	0	0	0
2017-08-22	C	PRE	P2	C_P	22.1	0	0	0	0	0	0	299.065	0	0	0	0	0	0	0	0	0	0
2017-09-07	C	PRE	P1	C_M	20.9	0	129.135	0	0	0	0	137.887	0	0	35.525	0	0	0	0	0	0	0
2017-09-07	C	PRE	P2	C_P	20.9	0	0	0	0	0	0	307.537	0	0	0	0	0	0	0	0	0	0
2017-09-14	C	PRE	P1	C_M	17.5	0	0	0	0	0	0	98.9775	0	0	115.672	0	0	0	0	0	48.3976	0	17.514	297.043	279.529
2017-09-21	C	PRE	P1	C_M	15.5	0	0	0	0	0	0	304.052	0	0	0	0	0	0	0	0	0	0	0	304.052	304.052
2017-08-06	I	PRE	P1	EE_M	26	40.736	0	0	0	0	0	55.018	0	0	168.502	0	0	0	0	0	0	32.294
2017-08-06	I	PRE	P2	EE_P	26	0	0	0	0	0	0	314.29	0	0	0	0	0	0	0	0	0	0
2017-08-21	I	PRE	P2	EE_P	22.2	0	0	0	0	0	0	299.747	0	0	0	0	0	0	0	0	0	0
2017-09-05	I	PRE	P1	EE_M	21.1	0	0	0	0	0	0	0	0	0	0	308.362	0	0	0	0	0	0
2017-09-05	I	PRE	P2	EE_P	21.1	0	0	0	0	0	0	302.187	0	0	0	0	0	0	0	0	0	0
2017-08-14	I	PRE	P1	EE_M	23	0	0	0	0	0	0	307.706	0	0	0	0	0	0	0	0	0	0	0	307.706	307.706
2017-08-20	I	PRE	P2	EE_M	22.2	0	0	0	0	0	0	93.226	0	0	0	0	0	0	0	0	206.49	0	0	299.716	299.716
										7	Z	p
									post	Browse	-0.383326	0.701478
control vs										Feed	-0.0638877	0.94906
interaction										Drink	0.0638877	0.94906
										Other	0.0638877	0.94906
										being fed	0.0638877	0.94906
										Self-grooming	0.0638877	0.94906
										Rest- Standing	0	1
										Rest- Lying	0.0638877	0.94906
										Sleep	0.0638877	0.94906
										Walk	0	1
										Sparring	-0.0638877	0.94906
										Lick urine	-0.0638877	0.94906
										Mount	-0.0638877	0.94906
										Necking/Nuzzling/Rubbing	-0.0638877	0.94906
										Grooming	-0.0638877	0.94906
										Lick	0.383326	0.701478
										Others	-0.0638877	0.94906
									during	Browse	0.383326	0.701478
										Feed	-0.0638877	0.94906
										Drink	-0.0638877	0.94906
										Other	-0.0638877	0.94906
										being fed	-3.06661	0.00216521
										Self-grooming	0.383326	0.701478
										Rest- Standing	1.72497	0.0845344
										Rest- Lying	-0.0638877	0.94906
										Sleep	-0.0638877	0.94906
										Walk	-0.511101	0.609281
										Sparring	0.0638877	0.94906
										Lick urine	0.0638877	0.94906
										Mount	0.0638877	0.94906
										Necking/Nuzzling/Rubbing	0.383326	0.701478
										Grooming	-0.0638877	0.94906
										Lick	1.72497	0.0845344
										Others	-0.0638877	0.94906
									pre	Browse	0	1
										Feed	0.383326	0.701478
										Drink	0.383326	0.701478
										Other	-0.0638877	0.94906
										being fed	-0.0638877	0.94906
										Self-grooming	-0.0638877	0.94906
										Rest- Standing	-0.127775	0.898327
										Rest- Lying	0.0638877	0.94906
										Sleep	0.0638877	0.94906
										Walk	1.0222	0.306686
										Sparring	-0.383326	0.701478
										Lick urine	0.0638877	0.94906
										Mount	0.0638877	0.94906
										Necking/Nuzzling/Rubbing	0.0638877	0.94906
										Grooming	0.0638877	0.94906
										Lick	0	1
										Others	-0.383326	0.701478
ingestion total			Browse	Feed	Drink	Other	being fed	tot
during			0	0	0	0	0	0	C
			116.32	0	0	0	0	116.32	C
			0	0	0	0	0	0	C
			0	0	0	0	0	0	C
			0	0	0	0	0	0	C
			0	0	0	0	0	0	C
			0	0	0	0	0	0	C
			0	0	0	0	148.541	148.541	I
			0	0	0	0	257.844	257.844	I
			0	0	0	0	113.906	113.906	I
			0	0	0	0	139.892	139.892	I
			0	0	0	0	164.184	164.184	I
			0	0	0	0	108.118	108.118	I
			0	0	0	0	221.307	221.307	I
						Z	p
						-2.81106	0.00493821
temperatures
	C	25.2
	C	25.2
	C	22.1		Z	p
	C	20.9		-1.5333	0.125202
	C	20.9
	C	17.5
	C	15.5
	I	26
	I	26
	I	22.2
	I	21.1
	I	21.1
	I	23
	I	22.2

## Sheet: Frank
giorni	int/contr	P/D/POST	P/D/POST1		T°C	Browse	Feed	Drink	Other	being fed	Self-grooming	Rest- Standing	Rest- Lying	Sleep	Walk	Sparring	Lick urine	Mount	Necking/Nuzzling/Rubbing	Grooming	Lick	Others	Not Visible	TOTALE	TOT VISIBLE
2017-08-07	C1	D	D1	C_M	25.2	0	0	0	0	0	0	141.784	0	0	95.428	0	0	0	0	0	0	0	0	237.212	237.212
2017-08-07	C2	D	D2	C_P	25.2	0	0	0	0	0	5.976	110.15	0	0	6.333	0	0	0	0	0	0	0	0	122.459	122.459
2017-08-22	C3	D	D2	C_P	22.1	0	0	0	0	0	13.034	222.28	0	0	6.155	0	0	0	0	0	0	0	0	241.469	241.469
2017-09-07	C4	D	D1	C_M	20.9	0	0	0	0	0	0	209.848	0	0	22.654	0	0	0	0	0	0	0	0	232.502	232.502
2017-09-07	C5	D	D2	C_P	20.9	0	99.974	0	0	0	0	139.671	0	0	0	0	0	0	0	0	0	0	0	239.645	239.645
2017-09-14	C6	D	D1	C_M	17.5	0	21.915	0	0	0	0	222.281	0	0	0	0	0	0	0	0	0	0	0	244.196	244.196
2017-09-21	C7	D	D1	C_M	15.5	0	0	0	0	0	0	190.056	0	0	0	0	0	0	0	0	62.232	0	0	252.288	252.288
2017-08-06	I1	D	D1	EE_M	26	0	0	0	0	49.813	0	129.651	0	0	36.754	0	0	0	0	5.83	0	0	0	222.048	222.048
2017-08-06	I2	D	D2	EE_P	26	0	0	0	0	3.457	0	189.292	0	0	46.097	0	0	0	0	0	0	0	0	238.846	238.846
2017-08-21	I3	D	D2	EE_P	22.2	0	20.699	0	0	0	0	31.437	0	0	0	0	0	0	0	0	185.702	0	0	237.838	237.838
2017-09-05	I4	D	D1	EE_M	21.1	0	17.862	0	0	56.698	0	172.719	0	0	30.797	0	0	0	0	0	0	0	0	278.076	278.076
2017-09-05	I5	D	D2	EE_P	21.1	0	121.968	0	0	0	0	223.919	0	0	16.239	0	0	0	0	0	0	0	0	362.126	362.126
2017-08-14	I6	D	D1	EE_M	23	0	0	0	0	129.142	0	126.255	0	0	0	0	0	0	0	0	0	0	0	255.397	255.397
2017-08-20	I7	D	D2	EE_M	22.2	0	0	0	0	109.298	0	98.736	0	0	29.636	0	0	0	0	0	0	0	0	237.67	237.67
2017-08-07	C1	Post	Post1	C_M	25.2	0	0	0	0	0	0	159.075	0	0	0	0	0	0	0	0	133.363	0	0	292.438	292.438
2017-08-07	C2	Post	Post2	C_P	25.2	0	0	0	0	0	0	111.764	0	0	177.999	0	0	0	0	0	48.853	0	0	338.616	338.616
2017-08-22	C3	Post	Post2	C_P	22.1	0	0	0	0	0	0	304.862	0	0	0	0	0	0	0	0	0	0	0	304.862	304.862
2017-09-07	C4	Post	Post1	C_M	20.9	0	0	0	0	0	0	22.058	0	0	0	0	0	0	0	0	213.653	0	0	235.711	235.711
2017-09-07	C5	Post	Post2	C_P	20.9	0	238.02	0	0	0	0	38.932	0	0	23.598	0	0	0	0	0	0	0	0	300.55	300.55
2017-09-14	C6	Post	Post1	C_M	17.5	0	0	0	0	0	0	37.389	0	0	78.813	0	0	0	0	0	183.2	0	0	299.402	299.402
2017-09-21	C7	Post	Post2	C_M	15.5	0	0	0	0	0	0	113.247	0	0	0	184.598	0	0	0	0	0	0	0	297.845	297.845
2017-08-06	I1	Post	Post1	EE_M	26	0	0	0	0	0	4.749	20.472	0	0	15.389	0	0	0	0	0	261.373	0	0	301.983	301.983
2017-08-06	I2	Post	Post2	EE_P	26	0	0	0	0	0	0	299.151	0	0	0	0	0	0	0	0	0	0	0	299.151	299.151
2017-08-21	I3	Post	Post2	EE_P	22.2	0	0	0	0	0	0	226.012	0	0	79.419	0	0	0	4.77	0	0	0	0	310.201	310.201
2017-09-05	I4	Post	Post1	EE_M	21.1	0	0	0	0	0	0	0	0	0	0	0	0	0	0	0	307.631	0	0	307.631	307.631
2017-09-05	I5	Post	Post2	EE_P	21.1	0	0	0	0	0	0	0	0	0	0	0	0	0	0	0	300.817	0	0	300.817	300.817
2017-08-14	I6	Post	Post1	EE_M	23	0	0	0	0	0	0	297.336	0	0	0	0	0	0	0	0	0	0	0	297.336	297.336
2017-08-20	I7	Post	Post2	EE_M	22	0	0	0	0	0	0	315.672	0	0	0	0	0	0	0	0	0	0	0	315.672	315.672
2017-08-07	C1	PRE	P1	C_M	25.2	0	37.241	0	0	0	0	55.631	0	0	25.283	0	0	0	0	0	179.221	0	0	297.376	297.376
2017-08-07	C2	PRE	P2	C_P	25.2	0	0	0	0	0	0	278.169	0	0	0	0	0	0	0	0	0	0	0	278.169	278.169
2017-08-22	C3	PRE	P2	C_P	22.1	0	0	0	0	0	10.076	61.427	0	0	0	0	0	0	0	0	222.267	0	0	293.77	293.77
2017-09-07	C4	PRE	P1	C_M	20.9	0	0	0	0	0	0	346.252	0	0	11.486	0	0	0	0	0	0	0	0	357.738	357.738
2017-09-07	C5	PRE	P2	C_P	20.9	0	0	0	0	0	0	300.948	0	0	0	0	0	0	0	0	0	0	0	300.948	300.948
2017-09-14	C6	PRE	P1	C_M	17.5	0	0	0	0	0	0	122.298	0	0	5.45	173.596	0	0	0	0	0	0	0	301.344	301.344
2017-09-21	C7	PRE	P1	C_M	15.5	0	0	0	0	0	0	275.628	0	0	31.591	0	0	0	0	0	0	0	0	307.219	307.219
2017-08-06	I1	PRE	P1	EE_M	26	0	0	0	0	0	0	0	0	0	0	0	0	0	0	0	304.158	0	0	304.158	304.158
2017-08-06	I2	PRE	P2	EE_P	26	0	23.853	0	0	0	0	47.275	0	0	93.674	0	0	0	0	0	134.607	0	0	299.409	299.409
2017-08-21	I3	PRE	P2	EE_P	22.2	0	0	0	0	0	0	15.54	0	0	0	0	0	0	0	0	298.09	0	0	313.63	313.63
2017-09-05	I4	PRE	P1	EE_M	21.1	0	0	0	0	0	0	89.194	0	0	0	213.037	0	0	0	0	0	0	0	302.231	302.231
2017-09-05	I5	PRE	P2	EE_P	21.1	0	0	0	0	0	0	301.685	0	0	0	0	0	0	0	0	0	0	0	301.685	301.685
2017-08-14	I6	PRE	P1	EE_M	23	82.004	23.462	0	0	0	0	157.651	0	0	37.923	0	0	0	0	0	0	0	0	301.04	301.04
2017-08-20	I7	PRE	P2	EE_M	22.2	0	0	0	0	0	0	0	0	0	0	0	0	0	0	0	304.329	0	0	304.329	304.329
							7	Z	p
						post	Browse	0.0638877	0.94906
							Feed	0.383326	0.701478
							Drink	-0.0638877	0.94906
							Other	-0.0638877	0.94906
							being fed	-0.0638877	0.94906
							Self-grooming	-0.383326	0.701478
							Rest- Standing	0	1
							Rest- Lying	0.0638877	0.94906
							Sleep	0.0638877	0.94906
							Walk	0.511101	0.609281
							Sparring	0.383326	0.701478
							Lick urine	-0.0638877	0.94906
							Mount	-0.0638877	0.94906
							Necking/Nuzzling/Rubbing	-0.383326	0.701478
							Grooming	0.0638877	0.94906
							Lick	-0.255551	0.798298
							Others	0.0638877	0.94906
						during	Browse	0.0638877	0.94906
							Feed	-0.255551	0.798298
							Drink	0.0638877	0.94906
							Other	0.0638877	0.94906
							being fed	-2.17218	0.0298428
							Self-grooming	0.83054	0.406234
							Rest- Standing	1.14998	0.250154
							Rest- Lying	-0.0638877	0.94906
							Sleep	-0.0638877	0.94906
							Walk	-0.894427	0.371094
							Sparring	0.0638877	0.94906
							Lick urine	0.0638877	0.94906
							Mount	0.0638877	0.94906
							Necking/Nuzzling/Rubbing	0.0638877	0.94906
							Grooming	-0.383326	0.701478
							Lick	0	1
							Others	0.0638877	0.94906
						pre	Browse	-0.383326	0.701478
							Feed	-0.255551	0.798298
							Drink	0.0638877	0.94906
							Other	0.0638877	0.94906
							being fed	0.0638877	0.94906
							Self-grooming	0.383326	0.701478
							Rest- Standing	1.66108	0.0966985
							Rest- Lying	-0.0638877	0.94906
							Sleep	-0.0638877	0.94906
							Walk	0.319438	0.749394
							Sparring	0	1
							Lick urine	0.0638877	0.94906
							Mount	0.0638877	0.94906
							Necking/Nuzzling/Rubbing	0.0638877	0.94906
							Grooming	0.0638877	0.94906
							Lick	-1.08609	0.27744
							Others	0.0638877	0.94906
total ingestion		Browse	Feed	Drink	Other	being fed	tot		Z	p
during		0	0	0	0	0	0	C	-2.29996	0.0214514
		0	0	0	0	0	0	C
		0	0	0	0	0	0	C
		0	0	0	0	0	0	C
		0	99.974	0	0	0	99.974	C
		0	21.915	0	0	0	21.915	C
		0	0	0	0	0	0	C
		0	0	0	0	49.813	49.813	I
		0	0	0	0	3.457	3.457	I
		0	20.699	0	0	0	20.699	I
		0	17.862	0	0	56.698	74.56	I
		0	121.968	0	0	0	121.968	I
		0	0	0	0	129.142	129.142	I
		0	0	0	0	109.298	109.298	I

## Sheet: KAREGA
giorni	int/contr	P/D/POST	P/D/POST1		T°C	Browse	Feed	Drink	Other	being fed	Self-grooming	Rest- Standing	Rest- Lying	Sleep	Walk	Sparring	Lick urine	Mount	Necking/Nuzzling/Rubbing	Grooming	Lick	Others	Not Visible	TOTALE	tot visible
2017-08-07	C1	D	D1	C_M	25.2	0	0	0	0	0	0	212.361	0	0	0	0	0	0	0	0	25.674	0	0	238.035
2017-08-07	C2	D	D2	C_P	25.2	0	1.314	0	0	0	0	131.257	0	0	11.311	0	0	0	0	0	0	0	0	143.882
2017-08-22	C3	D	D2	C_P	22.1	0	0	0	0	0	0	238.486	0	0	0	0	0	0	0	0	0	0	0	238.486
2017-09-07	C4	D	D1	C_M	20.9	0	0	0	0	0	0	0	244.393	0	0	0	0	0	0	0	0	0	0	244.393
2017-09-07	C5	D	D2	C_P	20.9	0	78.725	0	0	0	22.626	98.422	0	0	36.055	0	0	0	0	0	0	0	0	235.828
2017-09-14	C6	D	D1	C_M	17.5	0	50.833	0	0	0	0	188.455	0	0	0	0	0	0	0	0	0	0	0	239.288
2017-09-21	C7	D	D1	C_M	15.5	0	0	0	0	0	0	350.412	0	0	0	0	0	0	0	0	0	0	0	350.412
2017-08-06	I1	D	D1	EE_M	26	0	53.255	0	0	0	0	108.151	0	0	41.86	0	0	0	0	0	0	0	0	203.266
2017-08-06	I2	D	D2	EE_P	26	0	0	0	0	0	0	242.313	0	0	0	0	0	0	0	0	0	0	0	242.313
2017-08-21	I3	D	D2	EE_P	22.2	0	0	0	0	0	0	251.436	0	0	0	0	0	0	0	0	0	0	0	251.436
2017-09-05	I4	D	D1	EE_M	21.1	0	0	0	0	0	0	230.837	0	0	0	0	0	0	0	0	0	0	0	230.837
2017-09-05	I5	D	D2	EE_P	21.1	0	44.323	0	0	0	0	169.561	0	0	11.256	0	0	0	17.955	0	0	0	0	243.095
2017-08-14	I6	D	D1	EE_M	23	0	0	0	0	0	0	228.104	0	0	0	0	0	0	0	0	0	0	0	228.104
2017-08-20	I7	D	D2	EE_M	22.2	0	0	0	0	0	0	207.279	0	0	0	0	0	0	0	0	0	0	0	207.279
2017-08-07	C1	Post	Post1	C_M	25.2	0	0	0	0	0	0	0	0	0	0	0	0	0	0	0	305.839	0	0	305.839
2017-08-07	C2	Post	Post2	C_P	25.2	0	0	0	0	0	0	297.444	0	0	0	0	0	0	0	0	0	0	0	297.444
2017-08-22	C3	Post	Post2	C_P	22.1	0	0	0	0	0	0	307.302	0	0	0	0	0	0	0	0	0	0	0	307.302
2017-09-07	C4	Post	Post1	C_M	20.9	0	0	0	0	0	0	0	306.704	0	0	0	0	0	0	0	0	0	0	306.704
2017-09-07	C5	Post	Post2	C_P	20.9	0	26.528	0	0	0	0	53.616	0	0	220.142	0	0	0	0	0	0	0	0	300.286
2017-09-14	C6	Post	Post1	C_M	17.5	0	0	0	0	0	0	271.52	0	0	23.133	0	0	0	0	0	0	0	0	294.653
2017-09-21	C7	Post	Post2	C_M	15.5	0	0	0	0	0	0	267	0	0	32.471	9.9	0	0	0	0	0	0	0	309.371
2017-08-06	I1	Post	Post1	EE_M	26	0	0	0	0	0	11.613	143.75	0	0	42.178	0	0	0	0	0	91.635	0	0	289.176
2017-08-06	I2	Post	Post2	EE_P	26	0	0	0	0	0	0	294.192	0	0	13.907	0	0	0	0	0	0	0	0	308.099
2017-08-21	I3	Post	Post2	EE_P	22.2	0	0	0	0	0	59.914	181.821	0	0	53.504	0	0	0	0	0	0	0	0	295.239
2017-09-05	I4	Post	Post1	EE_M	21.1	0	0	0	0	0	0	300.775	0	0	0	0	0	0	0	0	21.673	0	0	322.448
2017-09-05	I5	Post	Post2	EE_P	21.1	0	0	0	0	0	0	296.105	0	0	0	0	0	0	0	0	0	0	0	296.105
2017-08-14	I6	Post	Post1	EE_M	23	0	0	0	0	0	0	306.097	0	0	0	0	0	0	0	0	0	0	0	306.097
2017-08-20	I7	Post	Post2	EE_M	22	0	0	0	0	0	0	285.142	0	0	0	0	0	0	0	0	0	0	0	285.142
2017-08-07	C1	PRE	P1	C_M	25.2	0	0	0	0	0	0	213.298	0	0	16.319	0	0	0	0	23.977	48.786	0	0	302.38
2017-08-07	C2	PRE	P2	C_P	25.2	0	0	0	0	0	0	319.028	0	0	0	0	0	0	0	0	0	0	0	319.028
2017-08-22	C3	PRE	P2	C_P	22.1	0	0	0	0	0	0	253.488	0	0	0	0	0	0	0	0	0	0	0	253.488
2017-09-07	C4	PRE	P1	C_M	20.9	0	0	0	0	0	0	25.732	296.061	0	0	0	0	0	0	0	0	0	0	321.793
2017-09-07	C5	PRE	P2	C_P	20.9	0	0	0	0	0	0	299.718	0	0	0	0	0	0	0	0	0	0	0	299.718
2017-09-14	C6	PRE	P1	C_M	17.5	0	0	0	0	0	0	300.207	0	0	0	0	0	0	0	0	0	0	0	300.207
2017-09-21	C7	PRE	P1	C_M	15.5	0	0	0	0	0	0	0	301.848	0	0	0	0	0	0	0	0	0	0	301.848
2017-08-06	I1	PRE	P1	EE_M	26	0	0	0	0	0	0	215.949	0	0	36.923	0	0	0	0	0	45.224	0	0	298.096
2017-08-06	I2	PRE	P2	EE_P	26	0	0	0	0	0	0	303.617	0	0	0	0	0	0	0	0	0	0	0	303.617
2017-08-21	I3	PRE	P2	EE_P	22.2	0	0	0	0	0	0	0	286.135	0	0	0	0	0	0	0	0	0	0	286.135
2017-09-05	I4	PRE	P1	EE_M	21.1	0	0	0	0	0	0	0	0	0	0	333.418	0	0	0	0	0	0	0	333.418
2017-09-05	I5	PRE	P2	EE_P	21.1	0	0	0	0	0	0	0	299.075	0	0	0	0	0	0	0	0	0	0	299.075
2017-08-14	I6	PRE	P1	EE_M	23	0	102.2	0	0	0	0	79.014	0	0	60.559	0	0	0	52.909	0	0	0	0	294.682
2017-08-20	I7	PRE	P2	EE_M	22.2	0	0	0	0	0	0	0	334.339	0	0	0	0	0	0	0	0	0	0	334.339
							a 7	Z	p
						post	Browse	-0.0638877	0.94906
							Feed	0.383326	0.701478
							Drink	-0.0638877	0.94906
							Other	-0.0638877	0.94906
							being fed	-0.0638877	0.94906
							Self-grooming	-0.83054	0.406234
							Rest- Standing	-1.0222	0.306686
							Rest- Lying	0.383326	0.701478
							Sleep	-0.0638877	0.94906
							Walk	0	1
							Sparring	0.383326	0.701478
							Lick urine	-0.0638877	0.94906
							Mount	-0.0638877	0.94906
							Necking/Nuzzling/Rubbing	-0.0638877	0.94906
							Grooming	-0.0638877	0.94906
							Lick	-0.255551	0.798298
							Others	0.0638877	0.94906
						during	Browse	0.0638877	0.94906
							Feed	0.383326	0.701478
							Drink	-0.0638877	0.94906
							Other	-0.0638877	0.94906
							being fed	-0.0638877	0.94906
							Self-grooming	0.383326	0.701478
							Rest- Standing	-0.766652	0.443289
							Rest- Lying	0.383326	0.701478
							Sleep	-0.0638877	0.94906
							Walk	-0.0638877	0.94906
							Sparring	-0.0638877	0.94906
							Lick urine	-0.0638877	0.94906
							Mount	-0.0638877	0.94906
							Necking/Nuzzling/Rubbing	-0.383326	0.701478
							Grooming	0.0638877	0.94906
							Lick	0.383326	0.701478
							Others	-0.0638877	0.94906
						pre	Browse	0.0638877	0.94906
							Feed	-0.383326	0.701478
							Drink	0.0638877	0.94906
							Other	0.0638877	0.94906
							being fed	0.0638877	0.94906
							Self-grooming	0.0638877	0.94906
							Rest- Standing	1.40553	0.159865
							Rest- Lying	-0.383326	0.701478
							Sleep	0.0638877	0.94906
							Walk	-0.511101	0.609281
							Sparring	-0.383326	0.701478
							Lick urine	0.0638877	0.94906
							Mount	0.0638877	0.94906
							Necking/Nuzzling/Rubbing	-0.383326	0.701478
							Grooming	0.383326	0.701478
							Lick	0	1
							Others	-0.0638877	0.94906

## Sheet: BARIDI
giorni	int/contr	P/D/POST	P/D/POST1		T°C	Browse	Feed	Drink	Other	being fed	Self-grooming	Rest- Standing	Rest- Lying	Sleep	Walk	Sparring	Lick urine	Mount	Necking/Nuzzling/Rubbing	Grooming	Lick	Others	Not Visible	TOTALE	tot visible
2017-08-07	C1	D	D1	C_M	25.2	0	0	0	0	0	0	197.353	0	0	44.091	0	0	0	0	0	0	0	0	241.444	241.444
2017-08-07	C2	D	D2	C_P	25.2	0	0	0	0	0	0	220.095	0	0	0	0	0	0	0	16.335	0	0	0	236.43	236.43
2017-08-22	C3	D	D2	C_P	22.1	0	0	0	0	0	0	212.449	0	0	31.503	0	0	0	0	0	0	0	0	243.952	243.952
2017-09-07	C4	D	D1	C_M	20.9	0	0	0	0	0	0	234.686	0	0	0	0	0	0	0	0	0	0	0	234.686	234.686
2017-09-07	C5	D	D2	C_P	20.9	0	32.4	0	0	0	0	146.858	0	0	66.933	0	0	0	0	0	0	0	0	246.191	246.191
2017-09-14	C6	D	D1	C_M	17.5	0	28.7	0	0	0	0	201.09	0	0	9.584	0	0	0	0	0	0	0	0	239.374	239.374
2017-09-21	C7	D	D1	C_M	15.5	0	0	0	0	0	0	57.749	0	0	0	52.455	0	0	0	0	0	0	0	110.204	110.204
2017-08-06	I1	D	D1	EE_M	26	0	0	0	0	0	0	197.299	0	0	78.538	0	0	0	0	0	0	0	0	275.837	275.837
2017-08-06	I2	D	D2	EE_P	26	0	0	0	0	0	0	218.102	0	0	0	0	0	0	0	19.082	0	0	0	237.184	237.184
2017-08-21	I3	D	D2	EE_P	22.2	27.986	0	0	0	0	0	165.805	0	0	47.598	0	0	0	0	0	0	0	0	241.389	241.389
2017-09-05	I4	D	D1	EE_M	21.1	0	0	0	0	0	0	253.555	0	0	0	0	0	0	0	0	0	0	0	253.555	253.555
2017-09-05	I5	D	D2	EE_P	21.1	0	0	0	0	0	0	281.719	0	0	17.279	0	0	0	25.771	0	0	0	0	324.769	324.769
2017-08-14	I6	D	D1	EE_M	23	0	0	0	0	0	0	126.255	0	0	0	0	0	0	0	0	0	0	0	126.255	126.255
2017-08-20	I7	D	D2	EE_M	22.2	0	0	0	0	0	0	249.048	0	0	0	0	0	0	0	0	0	0	0	249.048	249.048
2017-08-07	C1	Post	Post1	C_M	25.2	0	106.586	0	0	0	0	175.881	0	0	21.159	0	0	0	0	0	0	0	0	303.626	303.626
2017-08-07	C2	Post	Post2	C_P	25.2	0	0	0	0	0	0	316.522	0	0	0	0	0	0	0	0	0	0	0	316.522	316.522
2017-08-22	C3	Post	Post2	C_P	22.1	0	28.827	0	0	0	10.25	199.526	0	0	66.87	0	0	0	0	0	0	0	0	305.473	305.473
2017-09-07	C4	Post	Post1	C_M	20.9	0	0	0	0	0	0	295.281	0	0	0	0	0	0	0	0	0	0	0	295.281	295.281
2017-09-07	C5	Post	Post2	C_P	20.9	0	68.096	0	0	0	0	91.398	0	0	125	0	0	0	0	0	20.427	0	0	304.921	304.921
2017-09-14	C6	Post	Post1	C_M	17.5	0	87.643	0	0	0	0	214.192	0	0	0	0	0	0	0	0	0	0	0	301.835	301.835
2017-09-21	C7	Post	Post2	C_M	15.5	0	0	0	0	0	0	242.32	0	0	8.124	41.701	0	0	0	0	0	0	0	292.145	292.145
2017-08-06	I1	Post	Post1	EE_M	26	0	0	0	0	0	0	245.92	0	0	38.084	0	0	0	0	26.224	0	0	0	310.228	310.228
2017-08-06	I2	Post	Post2	EE_P	26	0	0	0	0	0	0	261.607	0	0	0	0	0	11.126	0	22.267	0	0	0	295	295
2017-08-21	I3	Post	Post2	EE_P	22.2	48.953	0	0	0	0	0	175.2	0	0	40.928	0	0	0	26.785	0	0	0	0	291.866	291.866
2017-09-05	I4	Post	Post1	EE_M	21.1	0	0	0	0	0	0	301.811	0	0	0	0	0	0	0	0	0	0	0	301.811	301.811
2017-09-05	I5	Post	Post2	EE_P	21.1	0	0	0	0	0	0	298.832	0	0	0	0	0	0	0	0	0	0	0	298.832	298.832
2017-08-14	I6	Post	Post1	EE_M	23	0	0	0	0	0	0	298.412	0	0	0	0	0	0	0	0	0	0	0	298.412	298.412
2017-08-20	I7	Post	Post2	EE_M	22	0	0	0	0	0	0	295.943	0	0	0	0	0	0	0	0	0	0	0	295.943	295.943
2017-08-07	C1	PRE	P1	C_M	25.2	0	145.394	0	0	0	0	137.874	0	0	15.932	0	0	0	0	0	0	0	0	299.2	299.2
2017-08-07	C2	PRE	P2	C_P	25.2	0	126.167	0	0	0	0	166.992	0	0	5.658	0	0	0	0	0	0	0	0	298.817	298.817
2017-08-22	C3	PRE	P2	C_P	22.1	0	11.525	0	0	0	0	196.532	0	0	43.596	0	0	0	54.423	0	0	0	0	306.076	306.076
2017-09-07	C4	PRE	P1	C_M	20.9	0	0	0	0	0	0	223.631	0	0	26.463	0	0	0	0	0	0	0	27.051	277.145	250.094
2017-09-07	C5	PRE	P2	C_P	20.9	0	0	0	0	0	0	292.103	0	0	0	0	0	0	0	0	0	0	0	292.103	292.103
2017-09-14	C6	PRE	P1	C_M	17.5	0	0	0	0	0	0	60.029	0	0	22.566	214.758	0	0	0	0	0	0	0	297.353	297.353
2017-09-21	C7	PRE	P1	C_M	15.5	0	0	0	0	0	0	294.463	0	0	0	0	0	0	0	0	0	0	0	294.463	294.463
2017-08-06	I1	PRE	P1	EE_M	26	0	12.607	0	0	0	47.229	220.973	0	0	14.571	0	0	0	5.222	0	0	0	0	300.602	300.602
2017-08-06	I2	PRE	P2	EE_P	26	0	0	0	0	0	0	300.129	0	0	0	0	0	0	0	0	0	0	0	300.129	300.129
2017-08-21	I3	PRE	P2	EE_P	22.2	0	0	0	0	0	0	300.795	0	0	0	0	0	0	0	0	0	0	0	300.795	300.795
2017-09-05	I4	PRE	P1	EE_M	21.1	0	0	0	0	0	0	0	0	0	11.435	286.536	0	0	0	0	0	0	0	297.971	297.971
2017-09-05	I5	PRE	P2	EE_P	21.1	0	0	0	0	0	0	297.038	0	0	0	0	0	0	0	0	0	0	0	297.038	297.038
2017-08-14	I6	PRE	P1	EE_M	23	0	0	0	0	0	0	297.062	0	0	0	0	0	0	0	0	0	0	0	297.062	297.062
2017-08-20	I7	PRE	P2	EE_M	22.2	0	0	0	0	0	0	303.919	0	0	0	0	0	0	0	0	0	0	0	303.919	303.919
% su visibile
giorni	int/contr	P/D/POST	P/D/POST1		T°C	Browse	Feed	Drink	Other	Eat	Self-grooming	Rest- Standing	Rest- Lying	Sleep	Walk	Sparring	Lick urine	Mount	Necking/Nuzzling/Rubbing	Grooming	Lick	Others	Not Visible	TOTALE	tot visible
2017-08-07	C	D	D1	C_M	25.2	0	0	0	0	0	0	197.353	0	0	44.091	0	0	0	0	0	0	0		241.444	241.444
2017-08-07	C	D	D2	C_P	25.2	0	0	0	0	0	0	220.095	0	0	0	0	0	0	0	16.335	0	0		236.43	236.43
2017-08-22	C	D	D2	C_P	22.1	0	0	0	0	0	0	212.449	0	0	31.503	0	0	0	0	0	0	0		243.952	243.952
2017-09-07	C	D	D1	C_M	20.9	0	0	0	0	0	0	234.686	0	0	0	0	0	0	0	0	0	0		234.686	234.686
2017-09-07	C	D	D2	C_P	20.9	0	32.4	0	0	0	0	146.858	0	0	66.933	0	0	0	0	0	0	0		246.191	246.191
2017-09-14	C	D	D1	C_M	17.5	0	28.7	0	0	0	0	201.09	0	0	9.584	0	0	0	0	0	0	0		239.374	239.374
2017-09-21	C	D	D1	C_M	15.5	0	0	0	0	0	0	57.749	0	0	0	52.455	0	0	0	0	0	0		110.204	110.204
2017-08-06	I	D	D1	EE_M	26	0	0	0	0	0	0	197.299	0	0	78.538	0	0	0	0	0	0	0		275.837	275.837
2017-08-06	I	D	D2	EE_P	26	0	0	0	0	0	0	218.102	0	0	0	0	0	0	0	19.082	0	0		237.184	237.184
2017-08-21	I	D	D2	EE_P	22.2	27.986	0	0	0	0	0	165.805	0	0	47.598	0	0	0	0	0	0	0		241.389	241.389
2017-09-05	I	D	D1	EE_M	21.1	0	0	0	0	0	0	253.555	0	0	0	0	0	0	0	0	0	0		253.555	253.555
2017-09-05	I	D	D2	EE_P	21.1	0	0	0	0	0	0	281.719	0	0	17.279	0	0	0	25.771	0	0	0		324.769	324.769
2017-08-14	I	D	D1	EE_M	23	0	0	0	0	0	0	126.255	0	0	0	0	0	0	0	0	0	0		126.255	126.255
2017-08-20	I	D	D2	EE_M	22.2	0	0	0	0	0	0	249.048	0	0	0	0	0	0	0	0	0	0		249.048	249.048
2017-08-07	C	Post	Post1	C_M	25.2	0	106.586	0	0	0	0	175.881	0	0	21.159	0	0	0	0	0	0	0		303.626	303.626
2017-08-07	C	Post	Post2	C_P	25.2	0	0	0	0	0	0	316.522	0	0	0	0	0	0	0	0	0	0		316.522	316.522
2017-08-22	C	Post	Post2	C_P	22.1	0	28.827	0	0	0	10.25	199.526	0	0	66.87	0	0	0	0	0	0	0		305.473	305.473
2017-09-07	C	Post	Post1	C_M	20.9	0	0	0	0	0	0	295.281	0	0	0	0	0	0	0	0	0	0		295.281	295.281
2017-09-07	C	Post	Post2	C_P	20.9	0	68.096	0	0	0	0	91.398	0	0	125	0	0	0	0	0	20.427	0		304.921	304.921
2017-09-14	C	Post	Post1	C_M	17.5	0	87.643	0	0	0	0	214.192	0	0	0	0	0	0	0	0	0	0		301.835	301.835
2017-09-21	C	Post	Post2	C_M	15.5	0	0	0	0	0	0	242.32	0	0	8.124	41.701	0	0	0	0	0	0		292.145	292.145
2017-08-06	I	Post	Post1	EE_M	26	0	0	0	0	0	0	245.92	0	0	38.084	0	0	0	0	26.224	0	0		310.228	310.228
2017-08-06	I	Post	Post2	EE_P	26	0	0	0	0	0	0	261.607	0	0	0	0	0	11.126	0	22.267	0	0		295	295
2017-08-21	I	Post	Post2	EE_P	22.2	48.953	0	0	0	0	0	175.2	0	0	40.928	0	0	0	26.785	0	0	0		291.866	291.866
2017-09-05	I	Post	Post1	EE_M	21.1	0	0	0	0	0	0	301.811	0	0	0	0	0	0	0	0	0	0		301.811	301.811
2017-09-05	I	Post	Post2	EE_P	21.1	0	0	0	0	0	0	298.832	0	0	0	0	0	0	0	0	0	0		298.832	298.832
2017-08-14	I	Post	Post1	EE_M	23	0	0	0	0	0	0	298.412	0	0	0	0	0	0	0	0	0	0		298.412	298.412
2017-08-20	I	Post	Post2	EE_M	22	0	0	0	0	0	0	295.943	0	0	0	0	0	0	0	0	0	0		295.943	295.943
2017-08-07	C	PRE	P1	C_M	25.2	0	145.394	0	0	0	0	137.874	0	0	15.932	0	0	0	0	0	0	0		299.2	299.2
2017-08-07	C	PRE	P2	C_P	25.2	0	126.167	0	0	0	0	166.992	0	0	5.658	0	0	0	0	0	0	0		298.817	298.817
2017-08-22	C	PRE	P2	C_P	22.1	0	11.525	0	0	0	0	196.532	0	0	43.596	0	0	0	54.423	0	0	0		306.076	306.076
2017-09-07	C	PRE	P1	C_M	20.9	0	0	0	0	0	0	201.803	0	0	271.121	0	0	0	0	0	0	0		277.145	250.094
2017-09-07	C	PRE	P2	C_P	20.9	0	0	0	0	0	0	292.103	0	0	0	0	0	0	0	0	0	0		292.103	292.103
2017-09-14	C	PRE	P1	C_M	17.5	0	0	0	0	0	0	60.029	0	0	22.566	214.758	0	0	0	0	0	0		297.353	297.353
2017-09-21	C	PRE	P1	C_M	15.5	0	0	0	0	0	0	294.463	0	0	0	0	0	0	0	0	0	0		294.463	294.463
2017-08-06	I	PRE	P1	EE_M	26	0	12.607	0	0	0	47.229	220.973	0	0	14.571	0	0	0	5.222	0	0	0		300.602	300.602
2017-08-06	I	PRE	P2	EE_P	26	0	0	0	0	0	0	300.129	0	0	0	0	0	0	0	0	0	0		300.129	300.129
2017-08-21	I	PRE	P2	EE_P	22.2	0	0	0	0	0	0	300.795	0	0	0	0	0	0	0	0	0	0		300.795	300.795
2017-09-05	I	PRE	P1	EE_M	21.1	0	0	0	0	0	0	0	0	0	11.435	286.536	0	0	0	0	0	0		297.971	297.971
2017-09-05	I	PRE	P2	EE_P	21.1	0	0	0	0	0	0	297.038	0	0	0	0	0	0	0	0	0	0		297.038	297.038
2017-08-14	I	PRE	P1	EE_M	23	0	0	0	0	0	0	297.062	0	0	0	0	0	0	0	0	0	0		297.062	297.062
2017-08-20	I	PRE	P2	EE_M	22.2	0	0	0	0	0	0	303.919	0	0	0	0	0	0	0	0	0	0		303.919	303.919
								a 7	Z	p
							post	Browse	-0.383326	0.701478
								Feed	1.72497	0.0845344
								Drink	-0.0638877	0.94906
								Other	-0.0638877	0.94906
								being fed	-0.0638877	0.94906
								Self-grooming	0.383326	0.701478
								Rest- Standing	-1.27775	0.201337
								Rest- Lying	0.0638877	0.94906
								Sleep	0.0638877	0.94906
								Walk	0.83054	0.406234
								Sparring	0.383326	0.701478
								Lick urine	-0.0638877	0.94906
								Mount	-0.383326	0.701478
								Necking/Nuzzling/Rubbing	-0.383326	0.701478
								Grooming	-0.83054	0.406234
								Lick	0.383326	0.701478
								Others	-0.0638877	0.94906
							during	Browse	-0.383326	0.701478
								Feed	0.83054	0.406234
								Drink	-0.0638877	0.94906
								Other	-0.0638877	0.94906
								being fed	-0.0638877	0.94906
								Self-grooming	-0.0638877	0.94906
								Rest- Standing	-0.766652	0.443289
								Rest- Lying	0.0638877	0.94906
								Sleep	0.0638877	0.94906
								Walk	0.127775	0.898327
								Sparring	0.383326	0.701478
								Lick urine	-0.0638877	0.94906
								Mount	-0.0638877	0.94906
								Necking/Nuzzling/Rubbing	-0.383326	0.701478
								Grooming	0	1
								Lick	0.0638877	0.94906
								Others	0.0638877	0.94906
							pre	Browse	-0.0638877	0.94906
								Feed	0.894427	0.371094
								Drink	-0.0638877	0.94906
								Other	-0.0638877	0.94906
								being fed	-0.0638877	0.94906
								Self-grooming	-0.383326	0.701478
								Rest- Standing	-1.91663	0.0552859
								Rest- Lying	0.0638877	0.94906
								Sleep	0.0638877	0.94906
								Walk	1.66108	0.0966985
								Sparring	0	1
								Lick urine	0.0638877	0.94906
								Mount	0.0638877	0.94906
								Necking/Nuzzling/Rubbing	0	1
								Grooming	-0.0638877	0.94906
								Lick	-0.0638877	0.94906
								Others	-0.0638877	0.94906
